# Supplementary material for: Abnormal cerebellar-prefrontal cortical pathways in obstructive sleep apnea with/without mild cognitive impairment
Source: PubMed Central journal article supplement (PMC9630600; doi:10.3389/fnins.2022.1002184), 2022-10-20
Supplement: Image_1.pdf [file Image_1.pdf]

Considering that the initial correlation score showed the existence of 1-2 abnormal points, we tried to eliminate these two abnormal points and carried out a new correlation analysis after strictly checking the information of the subjects. In the OSA-nMCI group, the dALFF value of the left posterior cerebellum was significantly positively correlated with the AHI score ( $r = 0.565$ ,  $p = 0.004$ ), ESS score ( $r = 0.695$ ,  $p < 0.000$ ), and arousal index ( $r = 0.460$ ,  $p = 0.024$ ), whereas the dALFF value of the right posterior cerebellar lobe was negatively correlated with the lowest oxygen saturation ( $r = -0.470$ ,  $p = 0.021$ ) (Supplemental Material Figure 1).

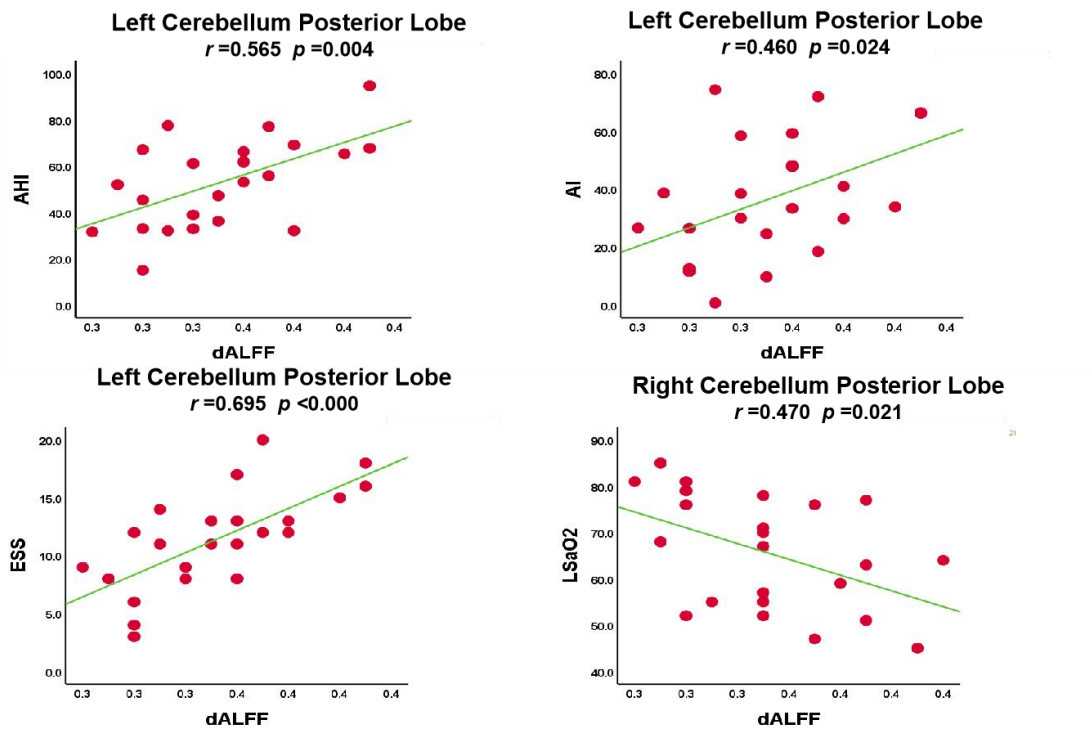

**Supplemental Material Figure 1** Correlations between dALFF value and clinical information in OSA-nMCI after removing two outliers.
